# Supplementary material for: Seasonal responses and host uniqueness of gut microbiome of Japanese macaques in lowland Yakushima
Source: PubMed Central journal article supplement (PMC9513907; doi:10.1186/s42523-022-00205-9), 2022-09-27

Supplementary Information 1 Rarefaction curves on the number of detected ASVs with the increasing number of reads

Akiko Sawada, Takashi Hayakawa, Yosuke Kurihara, Wanyi Lee, Goro Hanya  
Seasonal responses and host uniqueness of gut microbiome of Japanese macaques in the lowland Yakushima

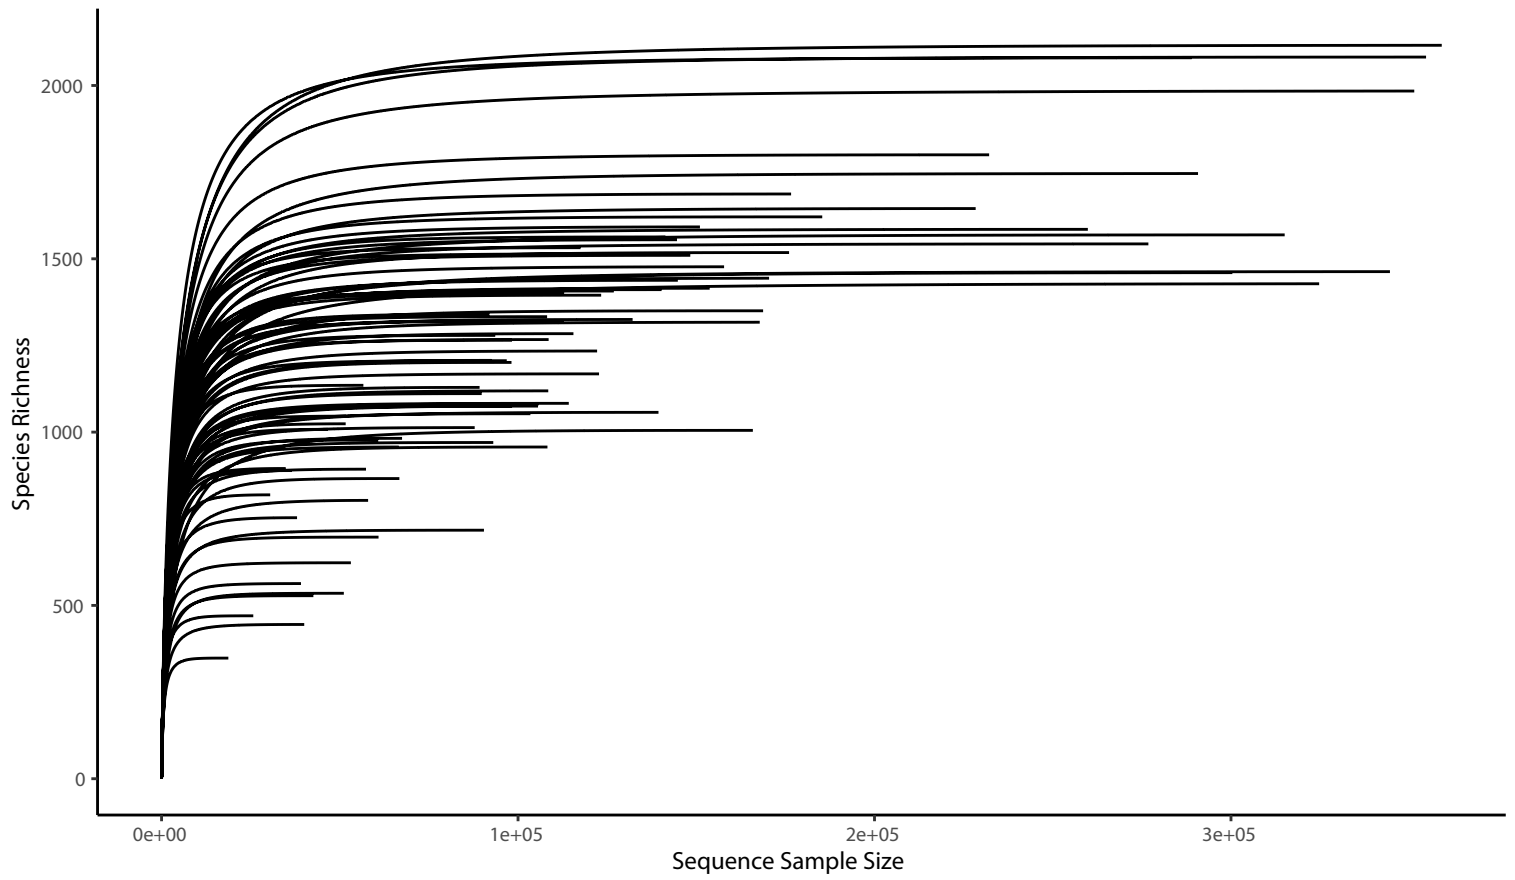

Supplement: 42523_2022_205_MOESM2_ESM.pdf [file 42523_2022_205_MOESM2_ESM.pdf]
