# Supplementary material for: Seasonal responses and host uniqueness of gut microbiome of Japanese macaques in lowland Yakushima
Source: PubMed Central journal article supplement (PMC9513907; doi:10.1186/s42523-022-00205-9), 2022-09-27
Supplement: 42523_2022_205_MOESM4_ESM.pdf [file 42523_2022_205_MOESM4_ESM.pdf]

(a) Phylum composition

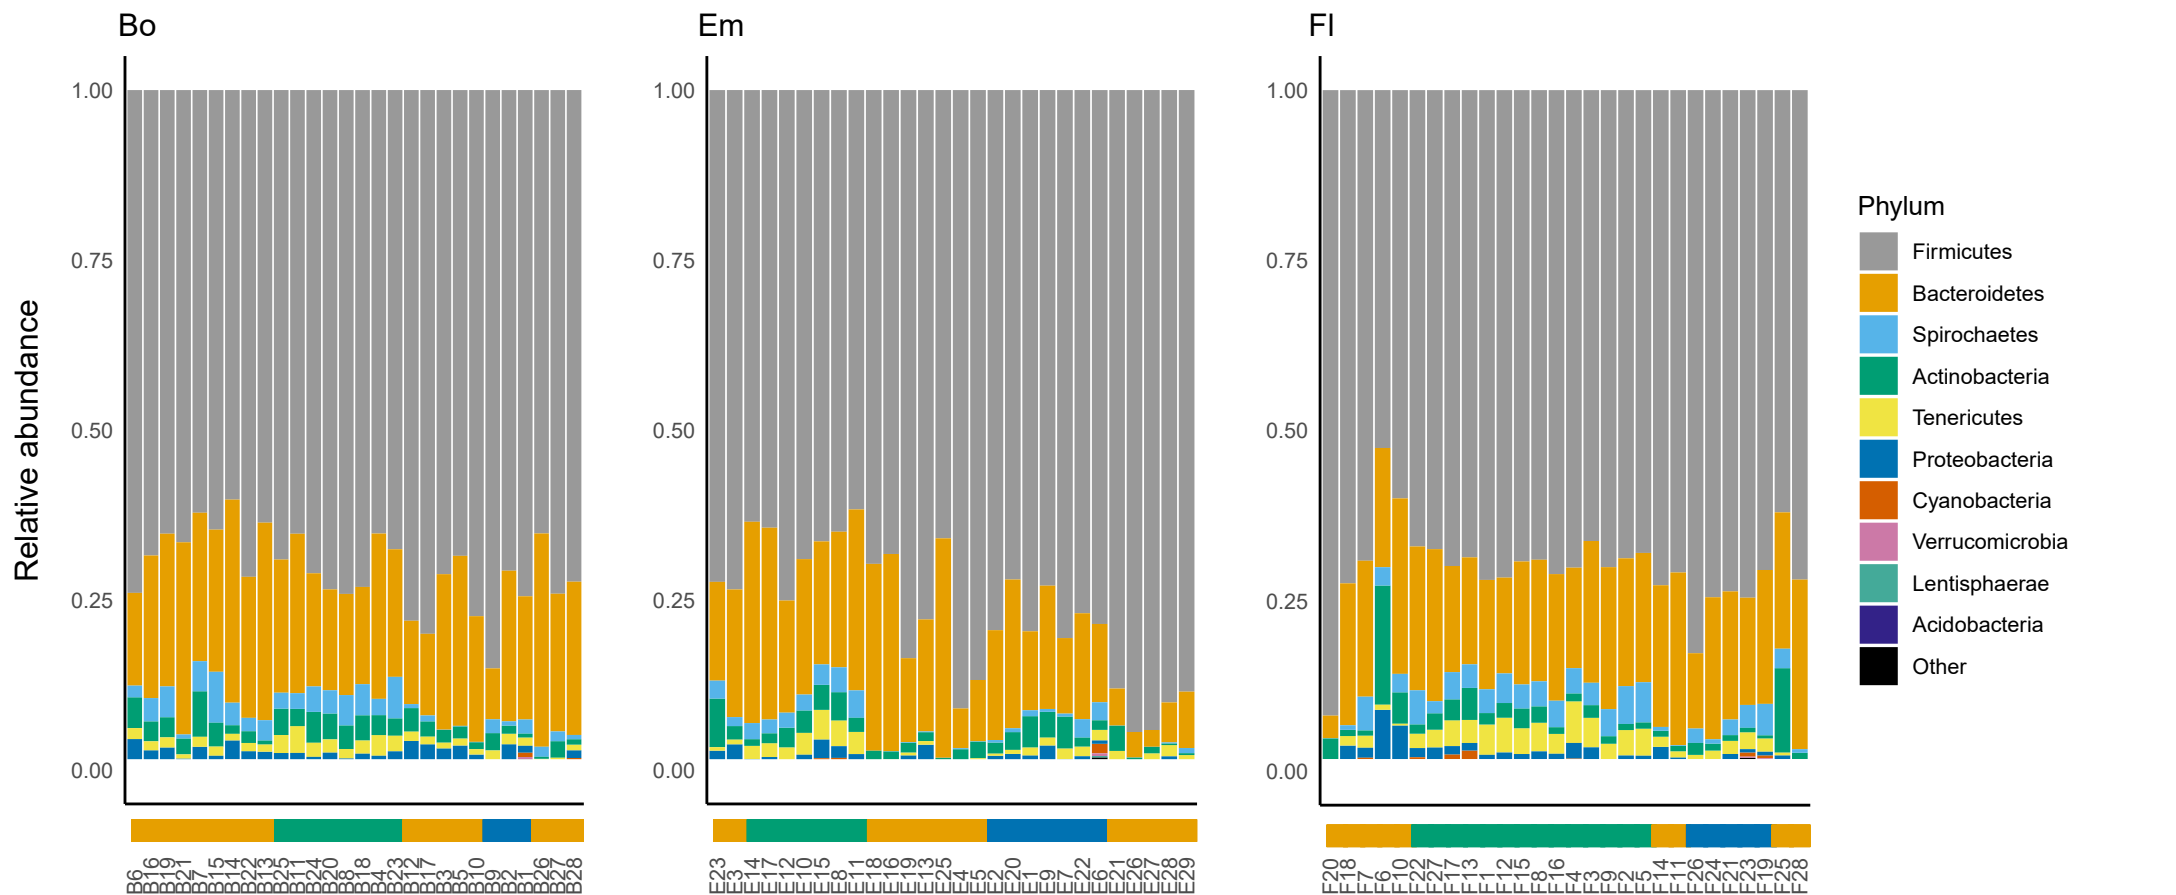

(b) Family composition

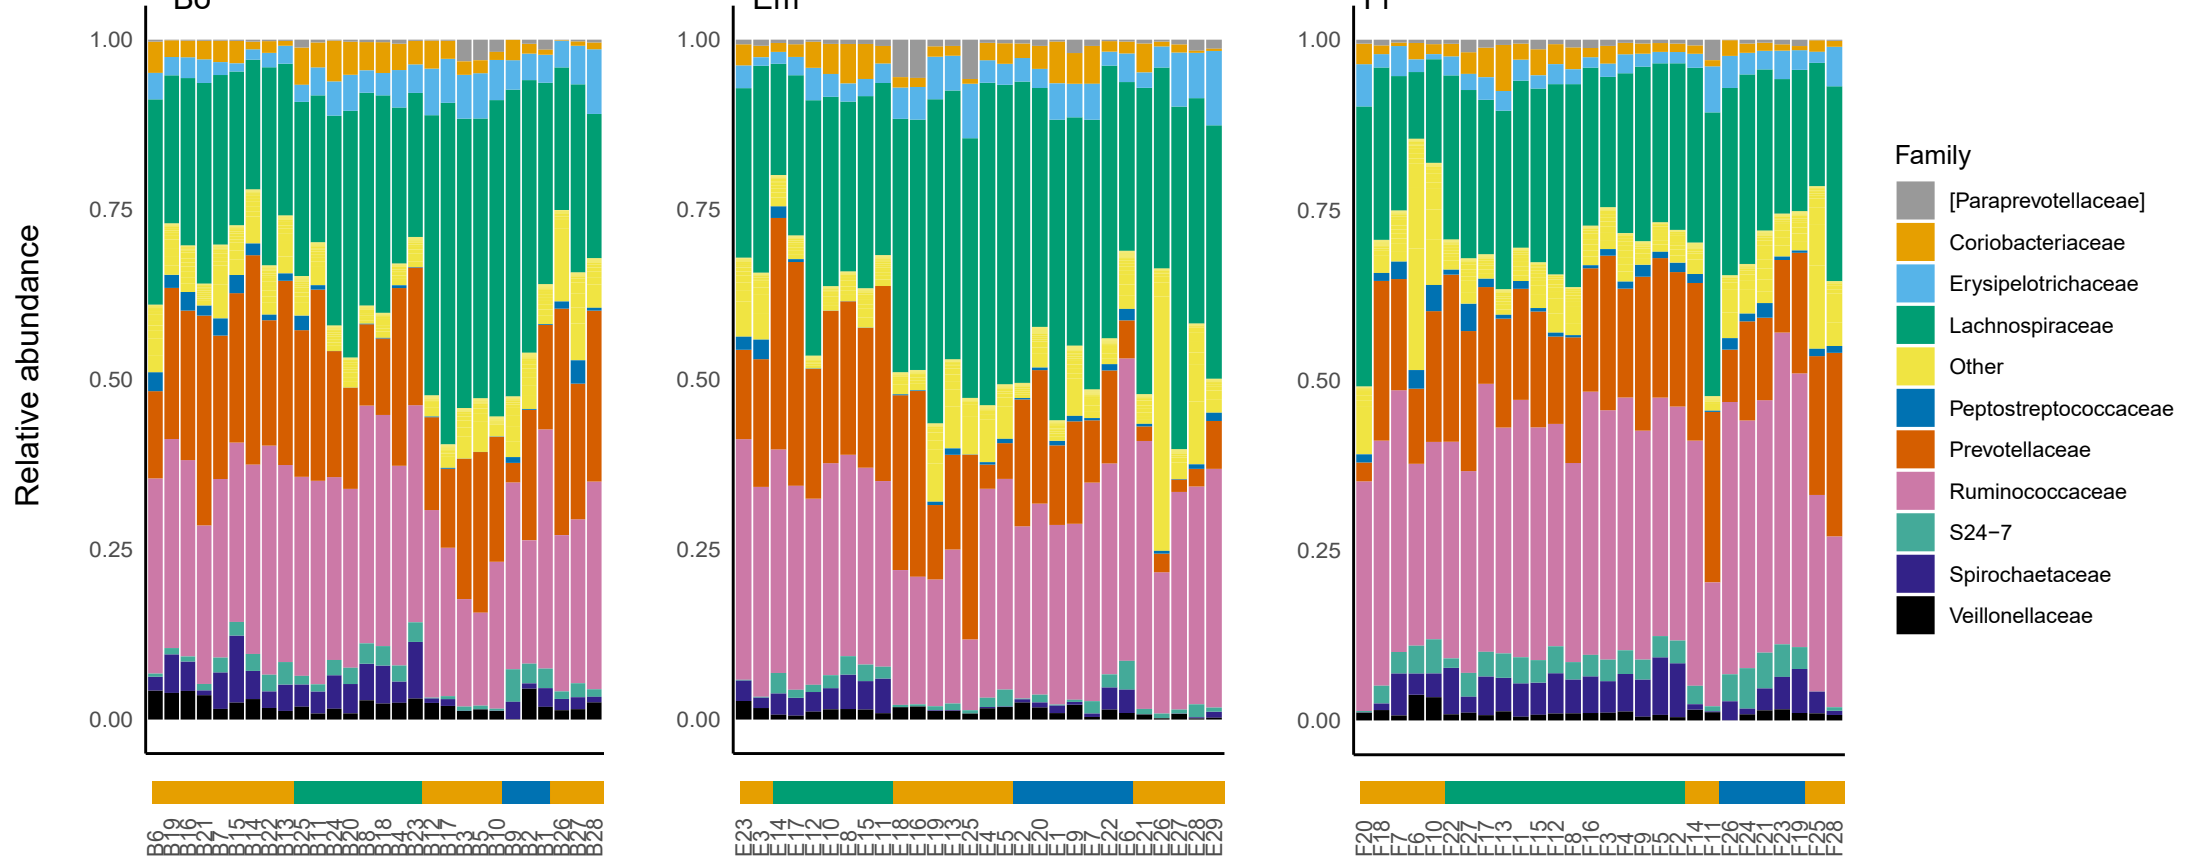

(c) Genus composition

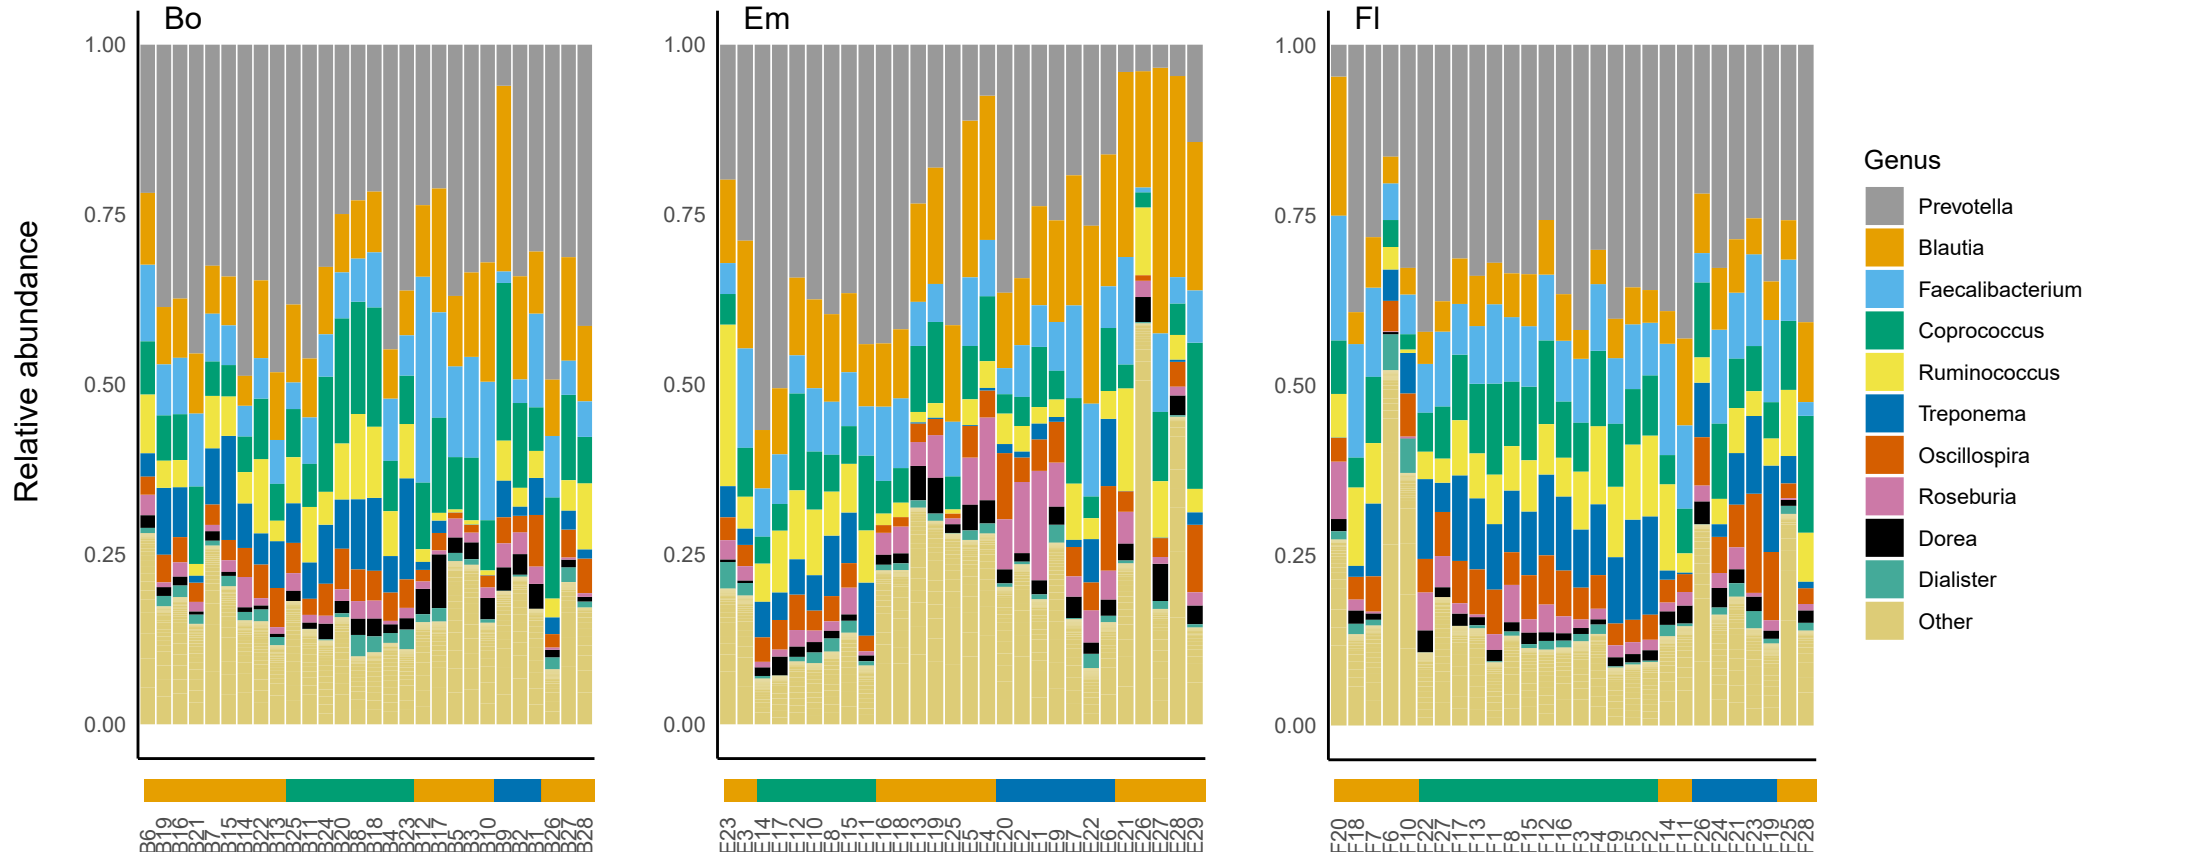

Season Fruit/Seed Leaf Invertebrate
